# Supplementary material for: In Silico RNAseq and Biochemical Analyses of Glucose-6-Phosphate Dehydrogenase (G6PDH) from Sweet Pepper Fruits: Involvement of Nitric Oxide (NO) in Ripening and Modulation
Source: MDPI journal article supplement (doi:10.3390/plants12193408), 2023-09-27
Supplement: s1 [file s1]

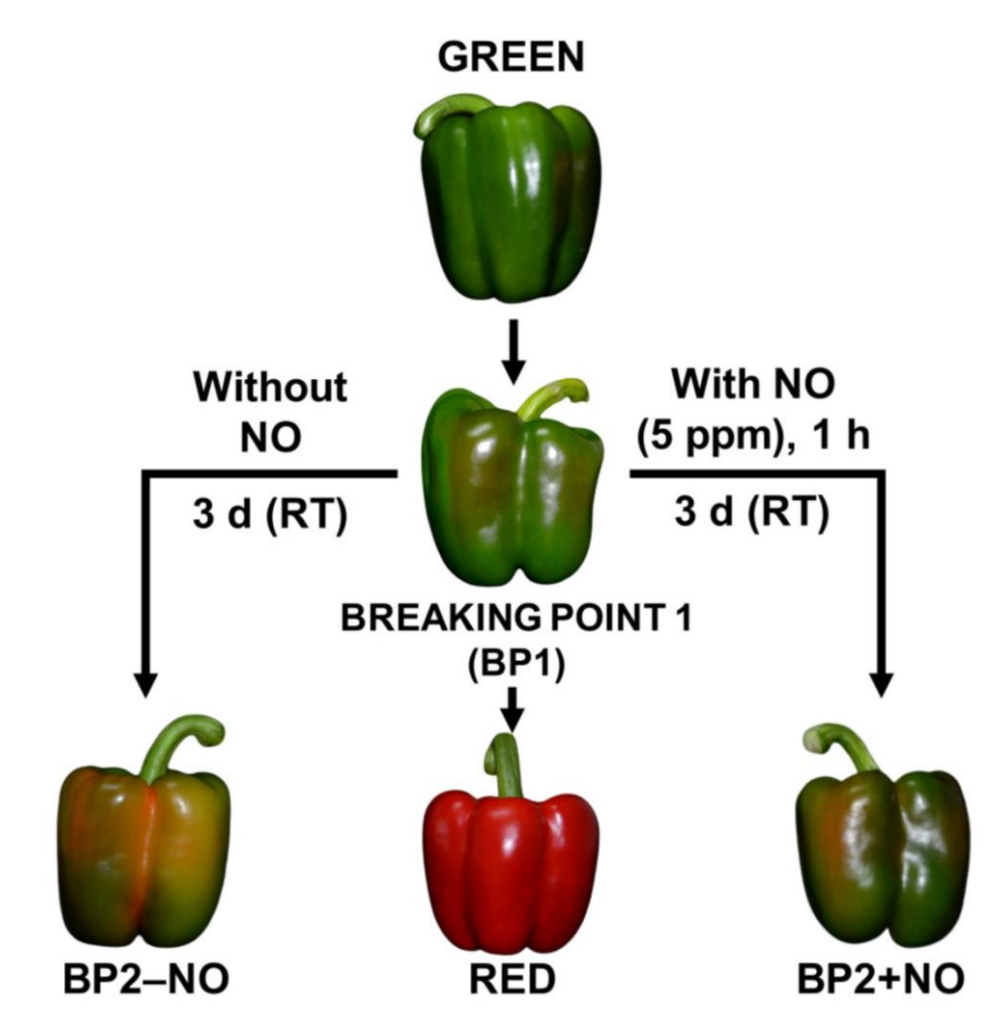

**Supplementary Figure S1.** Illustrative picture showing the experimental design used in this study with the representative phenotype of sweet pepper (*Capsicum annuum* L.) fruits at different stages and treatments: immature green, breaking point 1 (BP1), breaking point 2 without NO treatment (BP2 – NO), breaking point 2 with NO treatment (BP2 + NO), and ripe red. Fruits were subjected to a NO-enriched atmosphere (5 ppm) in a hermetic box for 1 h and were then stored at room temperature (RT) for 3 days. Reproduced with permission from González-Gordo et al. (2022b) [46].

**Supplementary Table S1.** List of the 53 different isozymes of G6PDH belonging to 15 different plant species used in this work for phylogenetic analysis.

| Plant species                                      | G6PDH isozyme                                                        | Protein ID                                                           | Reference                                          |
|----------------------------------------------------|----------------------------------------------------------------------|----------------------------------------------------------------------|----------------------------------------------------|
| Pepper<br>( <i>Capsicum annuum</i> )               | CaG6PDH1<br>CaG6PDH2<br>CaG6PDH3<br>CaG6PDH4                         | XP_016561682.1<br>XP_016570698.1<br>XP_016580465.1<br>XP_016573493.1 | The present study                                  |
| <i>Arabidopsis thaliana</i>                        | AtG6PDH1<br>AtG6PDH2<br>AtG6PDH3<br>AtG6PDH4<br>AtG6PDH5<br>AtG6PDH6 | Q43727.2<br>Q9FY99.2<br>Q8L743.2<br>Q93ZW0.1<br>Q9LK23.1<br>Q9FJI5.1 | Wendt et al., 1999;<br>Wakao and Benning,<br>2004) |
| Alfalfa<br>( <i>Medicago sativa</i> )              | MsG6PDH1                                                             | AAB41552.1                                                           | (Wendt et al., 1999)                               |
| Tobacco<br>( <i>Nicotiana tabacum</i> )            | NtG6PDH1<br>NtG6PDH2<br>NtG6PDH3                                     | CAA04994.1<br>AAF87216.1<br>CAA04992.1                               | (Wendt et al., 1999)                               |
| Rice<br>( <i>Oryza sativa</i> )                    | OsG6PDH1<br>OsG6PDH2<br>OsG6PDH3                                     | AAS07054.1<br>BAC84352.1<br>CAC09489.2                               | (Wendt et al., 1999)                               |
| Parsley ( <i>Petroselinum crispum</i> )            | PcG6PDH1<br>PcG6PDH2<br>PcG6PDH3                                     | AAB69318.1<br>AAB69319.1<br>AAB69317.1                               | (Wendt et al., 1999)                               |
| Potato ( <i>Solanum tuberosum</i> )                | StG6PDH1<br>StG6PDH2<br>StG6PDH3                                     | CAA52442.1<br>CAA58775.1<br>CAB52708.1                               | (Wendt et al., 1999)                               |
| Spinach ( <i>Spinacia oleracea</i> )               | SoG6PDH1                                                             | CAA03939.1                                                           | (Wendt et al., 1999)                               |
| Wheat ( <i>Triticum aestivum</i> )                 | TaG6PDH1                                                             | BAA97663.1                                                           | (Wendt et al., 1999)                               |
| Rubber tree ( <i>Hevea brasiliensis</i> )          | HbG6PDH1<br>HbG6PDH2<br>HbG6PDH3<br>HbG6PDH4                         | AIE47266.1<br>AIE47267.1<br>AIE47268.1<br>AIE47269.1                 | (Long et al., 2016)                                |
| Black cottonwood<br>( <i>Populus trichocarpa</i> ) | PtG6PDH1<br>PtG6PDH2<br>PtG6PDH3<br>PtG6PDH4                         | EEE79649.2<br>ERP53365.1<br>EEE94856.1<br>EEF03929.1                 | (Long et al., 2016)                                |
| Castor oil<br>( <i>Ricinus communis</i> )          | RcG6PDH1<br>RcG6PDH2<br>RcG6PDH3                                     | EEF47431.1<br>EEF32168.1<br>EEF50009.1                               | (Long et al., 2016)                                |
| Maize<br>( <i>Zea mays</i> )                       | ZmG6PDH1<br>ZmG6PDH2<br>ZmG6PDH3<br>ZmG6PDH4                         | AFW57831.1<br>DAA45780.1<br>NP_001348206.1<br>ACG39996.1             | (Long et al., 2016)                                |
| Tomato<br>( <i>Solanum lycopersicum</i> )          | SlG6PDH1<br>SlG6PDH2<br>SlG6PDH3<br>SlG6PDH4                         | XP_004230338.1<br>XP_004231802.1<br>XP_004239245.1<br>XP_004243567.1 | Tomato proteome                                    |

|                                   |          |                |                     |
|-----------------------------------|----------|----------------|---------------------|
| Soybean<br>( <i>Glycine max</i> ) | GmG6PDH1 | XP_003520786.1 | (Zhao et al., 2020) |
|                                   | GmG6PDH2 | NP_001241264.1 |                     |
|                                   | GmG6PDH3 | XP_003533032.1 |                     |
|                                   | GmG6PDH4 | XP_003547679.1 |                     |
|                                   | GmG6PDH5 | XP_003518668.1 |                     |
|                                   | GmG6PDH6 | XP_003553875.1 |                     |
|                                   | GmG6PDH7 | XP_003552660.1 |                     |
|                                   | GmG6PDH8 | XP_014633122.1 |                     |
|                                   | GmG6PDH9 | XP_003554604.1 |                     |

## References

- Long, X., He, B., Fang, Y., & Tang, C. (2016). Identification and characterization of the glucose-6-phosphate dehydrogenase gene family in the para rubber tree, *Hevea brasiliensis*. *Frontiers in Plant Science*, 7, 215. <https://doi.org/10.3389/fpls.2016.00215>
- Wakao, S., & Benning, C. (2004). Genome-wide analysis of glucose-6-phosphate dehydrogenases in *Arabidopsis*. *The Plant Journal*, 41, 243–256. <https://doi.org/10.1111/j.1365-313x.2004.02293.x>
- Wendt, U. K., Hauschild, R., Lange, C., Pietersma, M., Wenderoth, I., & von Schaewen, A. (1999). *Plant Molecular Biology*, 40, 487–494. <https://doi.org/10.1023/a:1006257230779>
- Zhao, Y., Cui, Y., Huang, S., Yu, J., Wang, X., Xin, D., Li, X., Liu, Y., Dai, Y., Qi, Z., & Chen, Q. (2020). Genome-wide analysis of the glucose-6-phosphate dehydrogenase family in soybean and functional identification of GMG6PDH2 involvement in salt stress. *Frontiers in Plant Science*, 11, 214. <https://doi.org/10.3389/fpls.2020.00214>
